# Supplementary material for: Construction and Tribological Properties of Biomimetic Cartilage-Lubricating Hydrogels
Source: MDPI journal article supplement (doi:10.3390/gels8070415), 2022-07-01
Supplement: s1 [file s1]

# Construction and Tribological Properties of Biomimetic Cartilage-lubricating Hydrogels

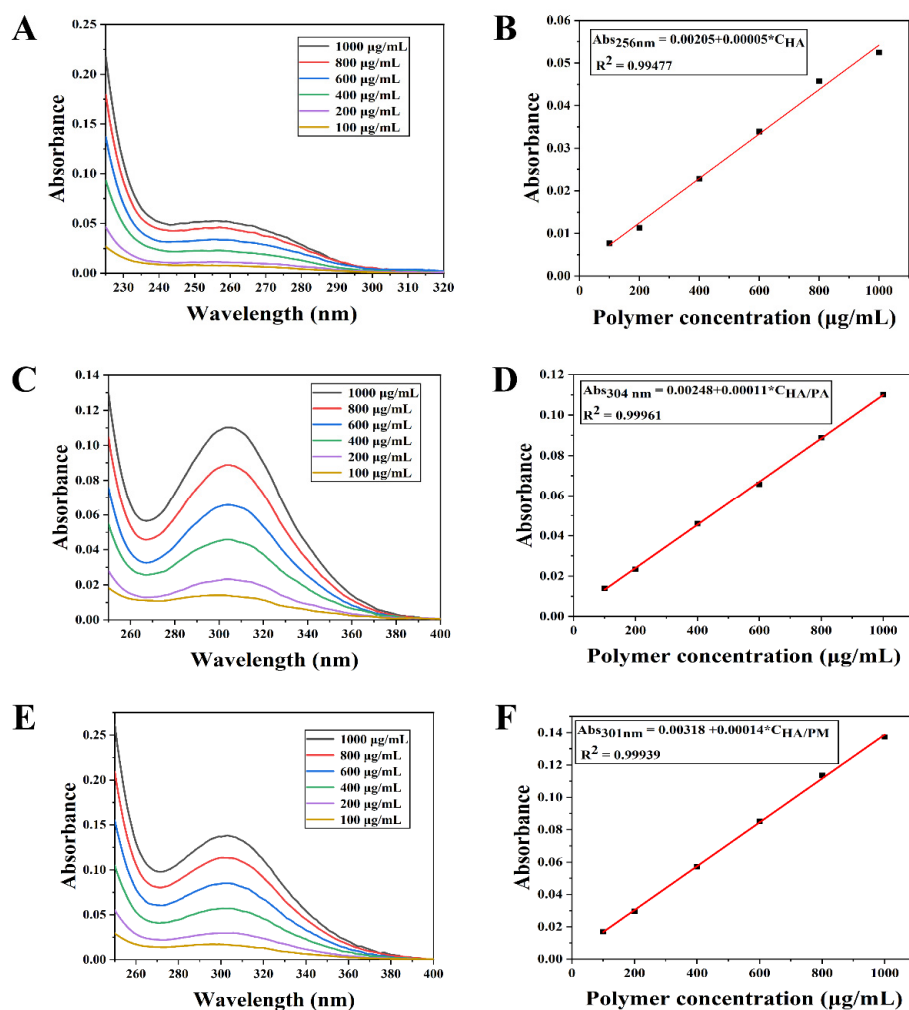

**Figure S1.** UV spectra and standard curves of HA, HA/PA and HA/PM of different concentrations. **(A)** UV spectra of HA. **(B)** Standard curves of HA. **(C)** UV spectra of HA/PA. **(D)** Standard curves of HA/PA. **(E)** UV spectra of HA/PM. **(F)** Standard curves of HA/PM.

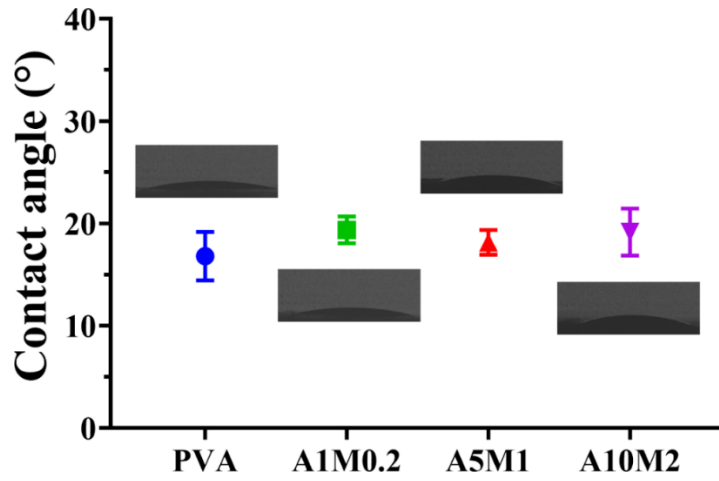

Figure S2. Contact angle of the PVA and HPX/PVA hydrogels.

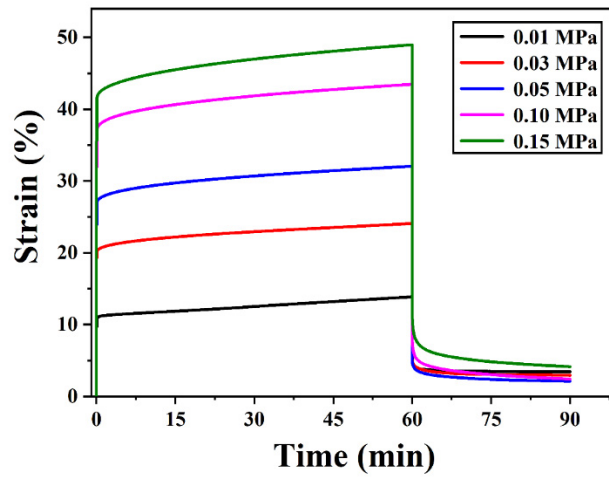

Figure S3. Creep curves of the PVA hydrogel under different pressures.

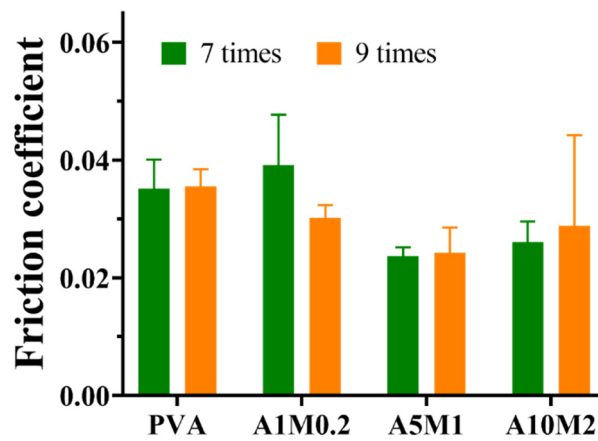

Figure S4. Friction coefficient of the PVA and HPX/PVA hydrogels for 7 and 9 freeze-thaw cycles.

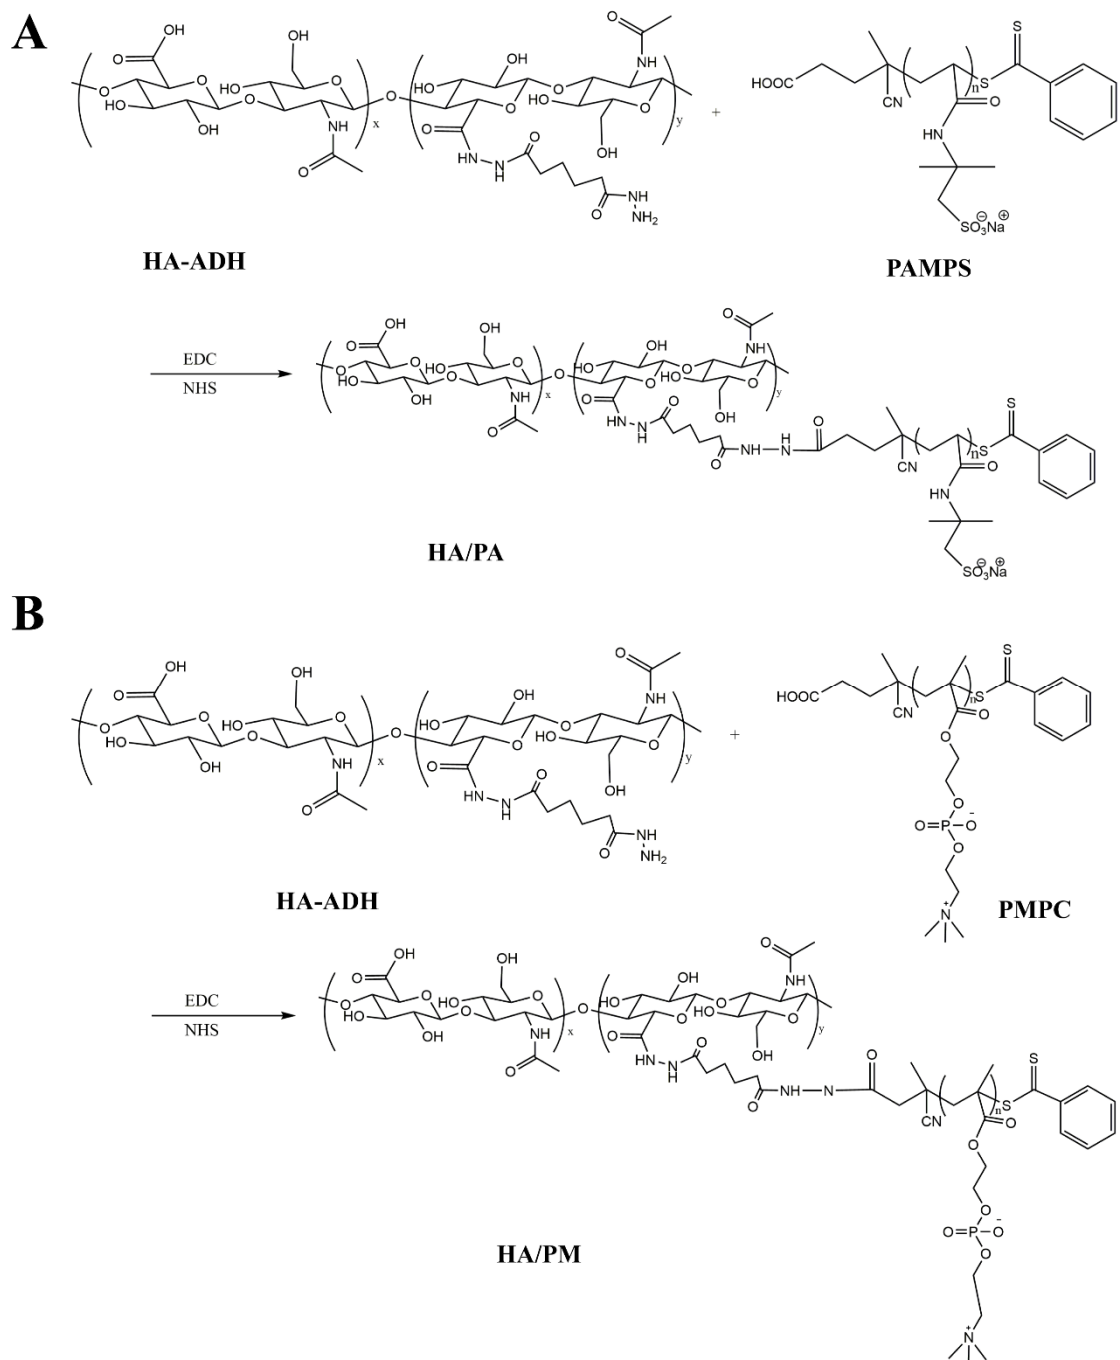

**Figure S5.** Synthetic route for the HA/PA (**A**), and HA/PM (**B**).

**Table S1.** The composition of the PVA and HPX/PVA hydrogels.

| Sample | PVA (wt%) | HPA (wt%) | HPM (wt%) |
|--------|-----------|-----------|-----------|
| PVA    | 15        | 0         | 0         |
| A1M0.2 | 15        | 0.085     | 0.017     |
| A5M1   | 15        | 0.425     | 0.085     |
| A10M2  | 15        | 0.850     | 0.17      |

**Table S2.** The theoretical element contents of the PVA and HPX/PVA hydrogels.

| Elements | PVA | A1M0.2 | A5M1 | A10M2 |
|----------|-----|--------|------|-------|
| N%       | 0   | 0.05   | 0.2  | 0.47  |
| S%       | 0   | 0.09   | 0.43 | 0.84  |
| P%       | 0   | 0.01   | 0.05 | 0.11  |

**Table S3.** Crystallinity from XRD patterns of the PVA and HPX/PVA hydrogels. Crystallinity for the PVA hydrogel was referred as 100%, and crystallinity of HPX/PVA hydrogels were normalized to that of the PVA hydrogel.

| Sample | Height | Area  | Crystallinity% |
|--------|--------|-------|----------------|
| PVA    | 856    | 74927 | 100            |
| A1M0.2 | 621    | 54523 | 72             |
| A5M1   | 593    | 50224 | 69             |
| A10M2  | 313    | 27739 | 36             |

**Table S4.** Glass transition temperature (T<sub>g</sub>), the melting temperature (T<sub>m</sub>), melting enthalpy (ΔH<sub>m</sub>) and crystallinity from DSC curves of the PVA and HPX/PVA hydrogels. ΔH<sub>m</sub> was calculated by integrating the peak areas of melting peaks. ΔH<sub>m</sub>\* of PVA is 138.6 J/g. Crystallinity X<sub>c</sub>% = ΔH<sub>m</sub>/ΔH<sub>m</sub>\*.

| Sample | T <sub>g</sub> (°C) | T <sub>m</sub> (°C) | ΔH <sub>m</sub> (J/g) | X <sub>c</sub> % |
|--------|---------------------|---------------------|-----------------------|------------------|
| PVA    | 73                  | 225                 | 71.8                  | 51.8             |
| A1M0.2 | 77                  | 220                 | 62.5                  | 45.1             |
| A5M1   | 75                  | 212                 | 53.3                  | 38.4             |
| A10M2  | 81                  | 210                 | 43.4                  | 31.3             |
